# Supplementary material
Source: PubMed Central journal article supplement (PMC3094139)
Supplement: supp_00254.2010_legends.pdf [file supp_00254.2010_legends.pdf]

## **SUPPLEMENTAL LEGENDS**

***Supplemental Figure 1.*** *Increased TNF- $\alpha$  production in colonic explants cultures from CsA-treated BMT animals.* Colon tissue explants were performed using full-thickness fragments of colon that were obtained using a 5 mm dermal punch. Tissue from normal, CsA-treated normal, control BMT and CsA-treated BMT mice washed 4 times in PBS, placed into 1 ml of 10 % complete RPMI growth media (10 % FBS, penicillin, streptomycin, gentamicin, amphotericin B,  $5 \times 10^{-5}$  M 2-ME) then placed in a 37 °C 5 % CO<sub>2</sub> incubator for 24 hours. The supernatant was removed and analyzed for TNF- $\alpha$  by ELISA (TNF- $\alpha$  ELISA Ready-SET-Go; eBioscience, San Diego, CA). Data pooled from 4 mice within each group and statistical difference determined by one-way ANOVA.

***Supplemental Figure 2.*** *Increased presence of MAdCAM-1 in colonic tissue of CsA treated mice.* Colon tissue was isolated at days 7, 14, 21 and 37 after BMT, snap frozen and sections from control BMT and CsA mice were stained by immunofluorescence techniques for the presence of MAdCAM-1 (100x). The data presented are representative of  $n=9$  from three independent experiments.
