# Supplementary material
Source: PubMed Central journal article supplement (PMC3094139)

Supplemental Figure 1

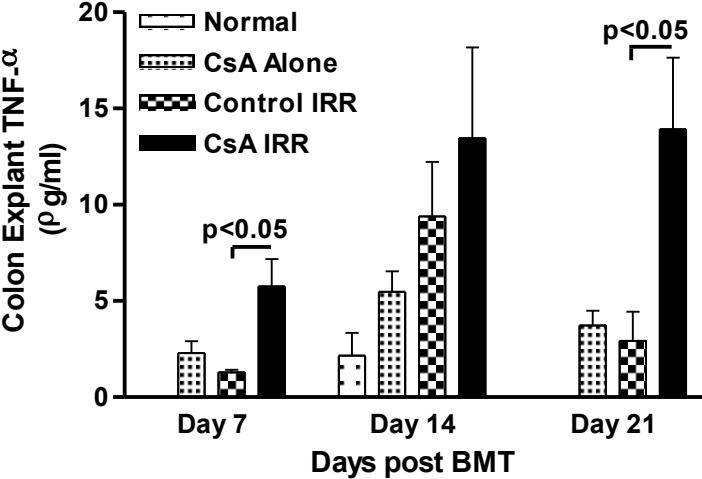

Supplement: supp_00254.2010_figS1.pdf [file supp_00254.2010_figS1.pdf]

Supplemental Figure 2

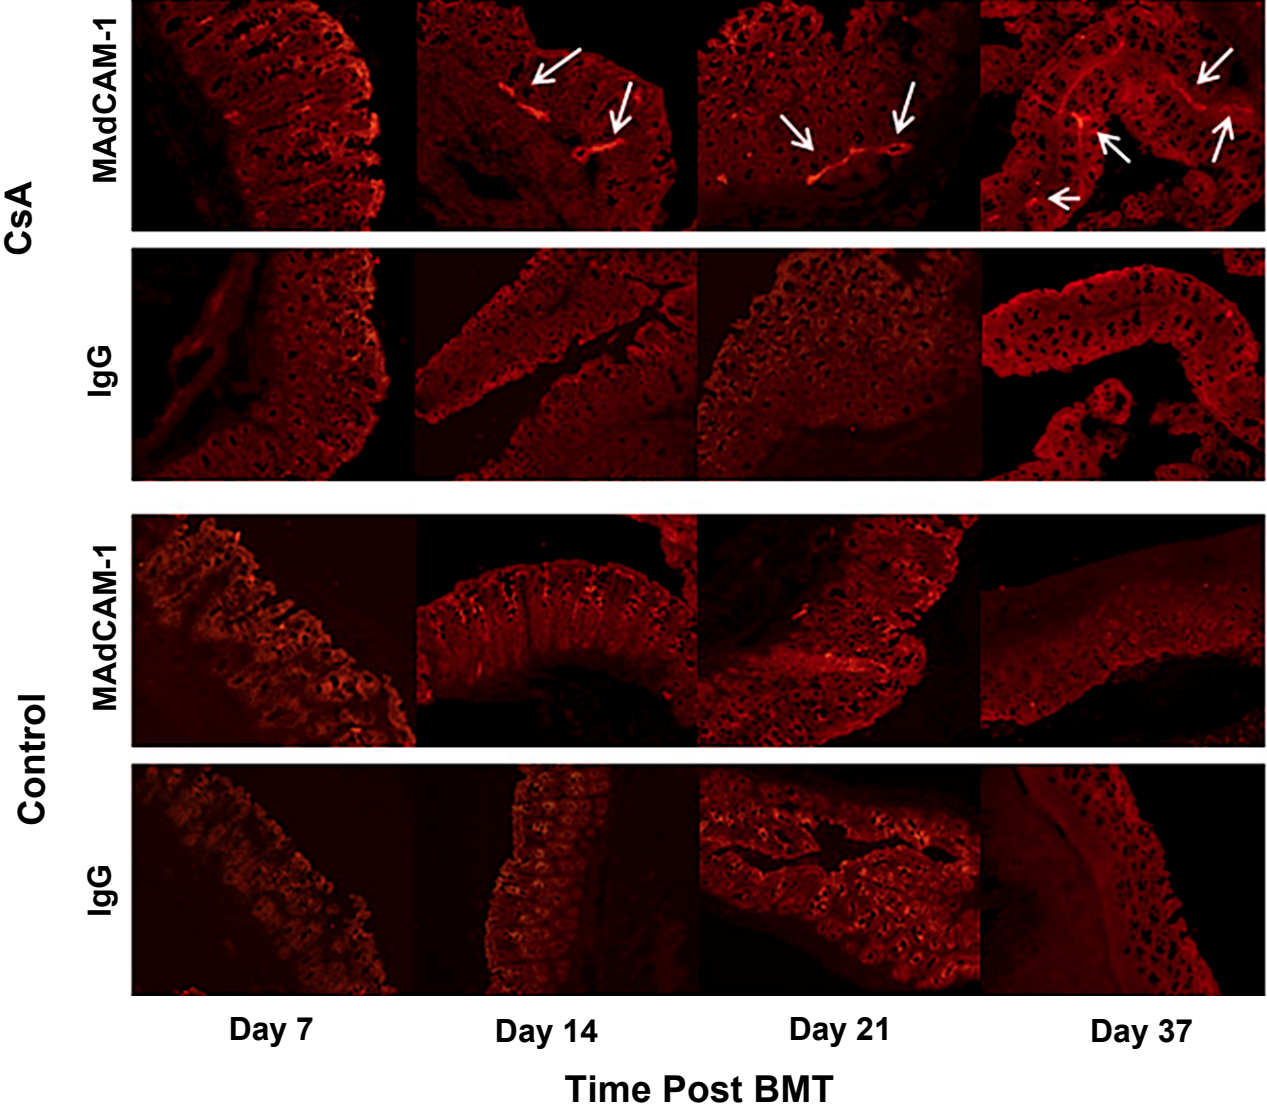

Supplement: supp_00254.2010_figS2.pdf [file supp_00254.2010_figS2.pdf]
